# Supplementary material
Source: PubMed Central journal article supplement (PMC5886311)
Supplement: NIHMS949690-supplement-SuppTables1-3.pdf [file NIHMS949690-supplement-SuppTables1-3.pdf]

# Diagnostic Accuracy of Memory Measures in Alzheimer's Dementia and Mild Cognitive Impairment: a Systematic Review and Meta-Analysis

## *Neuropsychology Review*

\*Gali H. Weissberger<sup>1,2</sup>, \*Jessica V. Strong<sup>2</sup>, Kayla B. Stefanidis<sup>6</sup>, Mathew J. Summers<sup>6</sup>, Mark W. Bondi<sup>3,4</sup>, & Nikki H. Stricker<sup>5,2</sup>

\*These authors contributed equally to this work

<sup>1</sup> Brain, Behavior, and Aging Research Center, VA Greater Los Angeles Healthcare System, Los Angeles, CA, USA

<sup>2</sup> New England GRECC, VA Boston Healthcare System, Boston, MA, USA

<sup>3</sup> VA San Diego Healthcare System, San Diego, CA, USA

<sup>4</sup> Department of Psychiatry, University of California San Diego, La Jolla, CA, USA

<sup>5</sup> Department of Psychiatry and Psychology, Mayo Clinic, Rochester, Minnesota, USA

<sup>6</sup> Sunshine Coast Mind and Neuroscience – Thompson Institute, University of the Sunshine Coast, Sippy Downs, Queensland, AUSTRALIA

Corresponding Author: Nikki H. Stricker, Ph.D., Mayo Clinic, 200 First Street SW, Rochester, MN 55905; 507-284-2649 (phone), 507-284-4158 (fax), [striker.nikki@mayo.edu](mailto:striker.nikki@mayo.edu) (email).

Table i: Studies comparing cognitive scores between normal elderly and patients with Alzheimer's Disease (AD vs. HC).

| <b>Immediate Recall</b>                   |           |           |                                           |                                |                    |                 |               |                              |                               |
|-------------------------------------------|-----------|-----------|-------------------------------------------|--------------------------------|--------------------|-----------------|---------------|------------------------------|-------------------------------|
| <b>Author (Year)</b>                      | <b>HC</b> | <b>AD</b> | <b>Measure Name</b>                       | <b>AD Diagnostic Threshold</b> | <b>Used in Dx?</b> | <b>2x2 data</b> | <b>Cutoff</b> | <b>Sns (CI<sub>95</sub>)</b> | <b>Spec (CI<sub>95</sub>)</b> |
| <b>Immediate List Free Recall</b>         |           |           |                                           |                                |                    |                 |               |                              |                               |
| Baek et al. (2012)                        | 53        | 72        | Korean HVL T Immediate Recall             | Probable                       | Unclear            | No              | Raw 17/18     | 85 (75-91)                   | 73 (60-83)                    |
| Bertolucci et al. (2001)                  | 85        | 43        | CERAD Word List Learning                  | Probable                       | No                 | No              | Raw = 13      | 86 (72-93)                   | 87 (78-93)                    |
| de Jager et al. (2003)                    | 51        | 60        | HVL T-R Total Recall                      | Both                           | No                 | No              | Raw = 18.5    | 98 (91-100)                  | 92 (81-97)                    |
| Duff et al. (2008)                        | 69        | 69        | RBANS List Learning Total                 | Both                           | Yes                | No              | SD = -1       | 82 (70-90)                   | 82 (71-90)                    |
| Ewers et al. (2012)                       | 101       | 81        | AVLT – Immediate Free Recall              | Unspecified                    | No                 | No              | None reported | 90 (82-95)                   | 91 (84-95)                    |
| Gavett et al. (2009)                      | 98        | 26        | NAB List Learning List A Immediate Recall | Both                           | No                 | No              | T <= 40       | 85 (65-96)                   | 90 (82-95)                    |
| Gonzalez-Palau et al. (2013) <sup>b</sup> | 109       | 54        | HVL T-R List Learning - Spanish           | Unspecified                    | No                 | No              | Raw <= 12     | 85 (74-92)                   | 88 (80-93)                    |
| Hogervorst et al. (2002)                  | 114       | 82        | HVL T List Learning                       | Both                           | No                 | No              | Raw = 14.5    | 91 (84-95)                   | 98 (92-100)                   |
| Ivanou et al. (2005)                      | 22        | 22        | CERAD Word List Learning -French          | Probable                       | No                 | No              | SD < -1.96    | 89 (70-97)                   | 100 (85-100)                  |
| Karrasch et al. (2005)                    | 15        | 15        | CERAD Word List Learning - Finnish        | Probable                       | Unclear            | No              | Raw <= 20     | 86 (61-96)                   | Not Reported                  |
| Kuslansky et al. (2004)                   | 323       | 70        | HVL T Word List Learning                  | Both                           | No                 | No              | Raw < 16      | 83 (73-90)                   | 83 (79-87)                    |
| Parra et al. (2012)                       | 10        | 10        | Word List Immediate Recall                | Unspecified                    | No                 | No              | Raw <= 17     | 90 (60-98)                   | 80 (49-94)                    |
| Salmon et al. (2002) <sup>c</sup>         | 98        | 98        | CVLT Trials 1-5 Total                     | Both                           | Yes                | No              | Raw < 36      | 95 (89-98)                   | 89 (81-94)                    |
| Shi et al. (2012)                         | 249       | 97        | HVL T Word list Learning                  | Probable                       | No                 | No              | Raw = 15.5    | 95 (88-98)                   | 93 (89-95)                    |

|                                                                |     |     |                                                                                |             |         |     |                         |            |              |
|----------------------------------------------------------------|-----|-----|--------------------------------------------------------------------------------|-------------|---------|-----|-------------------------|------------|--------------|
| Sotaniemi et al. (2012)                                        | 315 | 171 | CERAD Word list Learning - Finnish                                             | Unspecified | Unclear | No  | Raw < 17                | 90 (85-94) | 83 (78-87)   |
| Thompson et al. (2011)                                         | 156 | 27  | International Shopping List Test Total Free Recall                             | Probable    | No      | No  | < 10 <sup>th</sup> %ile | 82 (63-92) | 90 (84-94)   |
| Vogel et al. (2007)                                            | 28  | 35  | ADAS-Cog Memory Test Immediate Recall                                          | Both        | No      | No  | None Reported           | 89 (74-95) | 96 (82-99)   |
| Welsh et al. (1991)                                            | 49  | 147 | CERAD Word List Trial 1                                                        | Probable    | Unclear | Yes | SD < 2                  | 66 (58-73) | 96 (86-99)   |
| Welsh et al. (1991)                                            | 49  | 147 | CERAD Word List Trial 2                                                        | Probable    | Unclear | Yes | SD < 2                  | 73 (65-80) | 94 (84-98)   |
| Welsh et al. (1991)                                            | 49  | 147 | CERAD Word List Trial 3                                                        | Probable    | Unclear | Yes | SD < 2                  | 63 (55-70) | 98 (89-100)  |
| <b>Immediate List Cued and/or Selective Reminding Paradigm</b> |     |     |                                                                                |             |         |     |                         |            |              |
| Adam et al. (2007) <sup>a</sup>                                | 57  | 38  | RI-48 Cued Recall                                                              | Probable    | No      | No  | Raw < 19                | 92 (78-97) | 95 (84-87)   |
| Ivanou et al. (2005)                                           | 22  | 22  | RI-48 Cued Recall                                                              | Probable    | No      | No  | SD < -1.96              | 94 (76-99) | 100 (85-100) |
| Lehrner et al. (2007)                                          | 58  | 78  | Verbal Selective Reminding Test Total Immediate Recall; Grocery List- Austrian | Unspecified | No      | No  | Raw = 34                | 91 (82-96) | 93 (83-98)   |
| Lemos et al. (2014) <sup>a</sup>                               | 101 | 70  | FCSRT Immediate Recall (free & cued) – Portuguese Version                      | Probable    | Unclear | No  | Raw <= 27               | 94 (86-98) | 99 (96-100)  |
| Park et al. (2016)                                             | 34  | 28  | RI-24 (adaptation of RI-48) – Immediate Cued Recall                            | Probable    | No      | No  | Raw < 12.5              | 75 (57-87) | 91 (77-97)   |
| Paulsen et al. (1995)                                          | 20  | 20  | Buschke SRT – Recall from Short Term Memory                                    | Unspecified | No      | No  | None Reported           | 65 (44-82) | 80 (58-92)   |
| Vogel et al. (2007)                                            | 28  | 35  | Category Cued Recall Test – Cued Recall                                        | Both        | No      | No  | None reported           | 89 (74-95) | 96 (82-99)   |
| <b>Immediate Story Free Recall</b>                             |     |     |                                                                                |             |         |     |                         |            |              |
| Baek et al. (2012)                                             | 53  | 72  | Korean Story Recall Test Immediate Recall                                      | Probable    | Unclear | No  | Raw 10/11               | 76 (65-84) | 74 (61-84)   |

|                                       |    |    |                    |             |     |    |           |            |            |
|---------------------------------------|----|----|--------------------|-------------|-----|----|-----------|------------|------------|
| Duff et al. (2008)                    | 69 | 69 | RBANS Story Memory | Both        | Yes | No | SD = -1   | 72 (60-83) | 86 (76-93) |
| Storandt & Morris (2010) <sup>d</sup> | 23 | 55 | WMS Logical Memory | Unspecified | No  | No | SD = -0.5 | 62 (54-68) | 61 (44-76) |

#### Immediate Visual Free Recall

|                        |     |    |                                |          |         |     |               |            |            |
|------------------------|-----|----|--------------------------------|----------|---------|-----|---------------|------------|------------|
| Cahn et al. (1995)     | 236 | 40 | WMS (1945) Visual Reproduction | Both     | No      | Yes | Raw = 9       | 90 (77-96) | 79 (73-84) |
| de Jager et al. (2003) | 51  | 60 | The Placing Test               | Both     | No      | No  | Raw = 12.5    | 92 (82-97) | 92 (81-97) |
| Ivanoiu et al. (2005)  | 22  | 22 | “Shapes” Test Sum of Trials    | Probable | No      | No  | SD < -1.96    | 94 (76-99) | 94 (76-99) |
| Pengas et al. (2010)   | 33  | 22 | Visual Route Learning Test     | Probable | Unclear | No  | None reported | 95 (78-99) | 94 (80-98) |

#### Other Immediate Recall

|                     |     |     |                                   |      |     |    |           |             |            |
|---------------------|-----|-----|-----------------------------------|------|-----|----|-----------|-------------|------------|
| Duff et al. (2008)  | 69  | 69  | RBANS Immediate Memory Index      | Both | Yes | No | SD = -1   | 99 (92-100) | 82 (71-90) |
| Ivnik et al. (2000) | 432 | 232 | MCFS Learning Recall Factor Score | Both | Yes | No | Std. = 89 | 84 (79-88)  | 84 (80-87) |

#### Delayed Recall

| Author (Year)                   | HC  | AD | Measure Name                        | AD Diagnostic Threshold | Used in Dx? | 2x2 data | Cutoff        | Sns (CI <sub>95</sub> ) | Spec (CI <sub>95</sub> ) |
|---------------------------------|-----|----|-------------------------------------|-------------------------|-------------|----------|---------------|-------------------------|--------------------------|
| <b>Delayed List Free Recall</b> |     |    |                                     |                         |             |          |               |                         |                          |
| Baek et al. (2012)              | 53  | 72 | Korean HVLT– 20 Minute Delay        | Probable                | Unclear     | No       | Raw 5/6       | 85 (75-91)              | 86 (74-93)               |
| Bertolucci et al. (2001)        | 85  | 43 | CERAD Word List Delay               | Probable                | No          | No       | Raw = 3       | 74 (60-85)              | 82 (73-89)               |
| Cahn et al. (1995)              | 236 | 42 | CERAD Word List Delay               | Both                    | No          | Yes      | Raw = 4       | 88 (75-95)              | 84 (79-88)               |
| Chandler et al. (2005)          | 95  | 95 | CERAD Word List Delay               | Both                    | No          | No       | Raw = 4.5     | 93 (86-96)              | 90 (82-94)               |
| Duff et al. (2008)              | 69  | 69 | RBANS – List Recall                 | Both                    | Yes         | No       | SD = -2       | 92 (83-98)              | 96 (88-99)               |
| Ewers et al. (2012)             | 101 | 81 | AVLT – Delayed Free Recall          | Unspecified             | No          | No       | None reported | 86 (77-92)              | 90 (83-94)               |
| Gavett et al. (2009)            | 98  | 26 | NAB List Learning List A Long Delay | Both                    | No          | No       | T <= 40       | 92 (75-99)              | 97 (91-99)               |

|                                                              |     |     |                                                          |             |         |     |                                           |              |                   |
|--------------------------------------------------------------|-----|-----|----------------------------------------------------------|-------------|---------|-----|-------------------------------------------|--------------|-------------------|
|                                                              |     |     | Recall                                                   |             |         |     |                                           |              |                   |
| Gonzalez-Palau et al. (2013) <sup>b</sup>                    | 109 | 54  | HVLT-R Delayed Spanish                                   | Unspecified | No      | No  | Raw $\leq$ 3                              | 89 (77-95)   | 81 (72-87)        |
| Ivanoiu et al. (2005)                                        | 22  | 22  | CERAD Word List Delay - French                           | Probable    | No      | No  | SD $<$ -1.96                              | 100(85-100)  | 86 (66-95)        |
| Karrasch et al. (2005)                                       | 15  | 15  | CERAD Word List Delay - Finnish                          | Probable    | Unclear | No  | Raw $\leq$ 6                              | 86 (61-96)   | Not reported      |
| O'Connell et al. (2004)                                      | n/a | 28  | Delayed Word Recall                                      | Probable    | No      | Yes | None reported                             | 89 (72-96)   | Not computed      |
| Park et al. (2016)                                           | 34  | 28  | ADAS-cog WRT – Korean Version                            | Probable    | No      | No  | Raw $<$ 7.5                               | 85 (68-94)   | 91 (77-97)        |
| Parra et al. (2012)                                          | 10  | 10  | Word List Delayed Recall                                 | Unspecified | No      | No  | Raw $\leq$ 5                              | 80 (49-94)   | 80 (49-94)        |
| Salmon et al. (2002) <sup>e</sup>                            | 98  | 98  | CVLT Long Delay Free Recall                              | Both        | Yes     | No  | Z $\leq$ -1.5                             | 98 (93-99)   | 88 (80-93)        |
| Sotaniemi et al. (2012)                                      | 315 | 171 | CERAD Word List Delay – Finnish                          | Unspecified | Unclear | No  | Raw $<$ 5                                 | 94 (89-97)   | 85 (81-89)        |
| Thompson et al. (2011)                                       | 156 | 27  | International Shopping List Test Delayed Recall          | Probable    | No      | No  | $<$ 10 <sup>th</sup> %ile<br>OR Raw = 6.4 | 96 (82-99)   | 90 (84-94)        |
| Vogel et al. (2007)                                          | 28  | 35  | ADAS-Cog Memory – Delayed Recall                         | Both        | No      | No  | None reported                             | 100 (90-100) | 89 (73-96)        |
| Welsh et al. (1991)                                          | 49  | 147 | CEARD Word List Delay                                    | Probable    | Unclear | Yes | SD $<$ 2                                  | 93 (88-96)   | 94 (84-98)        |
| <b>Delayed List Cued and/or Selective Reminding Paradigm</b> |     |     |                                                          |             |         |     |                                           |              |                   |
| Brown & Storandt (2000)                                      | 73  | 34  | Double Memory Test                                       | Probable    | No      | No  | None reported                             | 88 (73-95)   | Set at 95 (87-98) |
| Delgado et al. (2016)                                        | 42  | 50  | FCSRT Word – Free Recall, Spanish Version                | Unspecified | No      | No  | Raw $\leq$ 22                             | 98 (90-100)  | 91 (79-97)        |
| Delgado et al. (2016)                                        | 42  | 50  | FCSRT Word – Total Free and Cued Recall, Spanish Version | Unspecified | No      | No  | Raw $\leq$ 39                             | 88 (76-94)   | 95 (84-99)        |
| Delgado et al. (2016)                                        | 42  | 50  | FCSRT Picture – Free Recall, Spanish Version             | Unspecified | No      | No  | Raw $\leq$ 26                             | 92 (81-97)   | 93 (81-98)        |

|                                  |     |     |                                                             |             |         |     |               |              |             |
|----------------------------------|-----|-----|-------------------------------------------------------------|-------------|---------|-----|---------------|--------------|-------------|
| Delgado et al. (2016)            | 42  | 50  | FCSRT Picture – Total Free and Cued Recall, Spanish Version | Unspecified | No      | No  | Raw ≤ 46      | 88 (76-94)   | 91 (79-97)  |
| Lehrner et al. (2007)            | 58  | 78  | Verbal SRT Delayed Recall – Austrian Version                | Unspecified | No      | No  | Raw = 6       | 94 (86-98)   | 91 (81-97)  |
| Lemos et al. (2014) <sup>a</sup> | 101 | 70  | FCSRT Delayed Recall – Portuguese Version                   | Probable    | Unclear | No  | Raw ≤ 8       | 96 (89-99)   | 97 (92-99)  |
| Loewenstein et al. (2004)        | 53  | 26  | FOME - Bag A Recall                                         | Probable    | No      | No  | None reported | 77 (58-89)   | 87 (75-94)  |
| Loewenstein et al. (2004)        | 53  | 26  | FOME - Bag A 20-minute                                      | Probable    | No      | No  | None reported | 89 (72-96)   | 91 (80-96)  |
| Park et al. (2016)               | 34  | 28  | RI-24 (adaptation of RI-48) – Delayed Cued Recall           | Probable    | No      | No  | Raw < 9.5     | 89 (72-96)   | 91 (77-97)  |
| Paulsen et al. (1995)            | 20  | 20  | Buschke SRT – Recall from Long Term Memory                  | Unspecified | No      | No  | None Reported | 90 (70-97)   | 95 (76-99)  |
| Saka et al. (2006)               | 33  | 45  | Enhanced Cued Recall Test – Total Free Recall               | Probable    | Unclear | No  | Raw = 19      | 93 (82-98)   | 97 (84-100) |
| Saka et al. (2006)               | 33  | 45  | Enhanced Cued Recall Test – Total Free and Cued Recall      | Probable    | Unclear | No  | Raw = 41      | 100 (92-100) | 94 (80-99)  |
| Takechi & Dodge (2010)           | 54  | 128 | Category Cued Memory Test                                   | Unspecified | No      | No  | Raw ≤ 7       | 81 (74-87)   | 82 (69-90)  |
| Vogel et al. (2007)              | 28  | 35  | Category Cued Recall Test                                   | Both        | No      | No  | None reported | 91 (78-97)   | 96 (82-99)  |
| <b>Delayed List Retention</b>    |     |     |                                                             |             |         |     |               |              |             |
| Cahn et al. (1995)               | 234 | 42  | CERAD Word List Retention                                   | Both        | No      | Yes | Raw < 66%     | 88 (75-95)   | 82 (77-86)  |
| Clark et al. (2010)              | 20  | 73  | RBANS List Retention                                        | Probable    | Unclear | No  | Raw < 60%     | 96 (89-99)   | 90 (68-99)  |
| Sotaniemi et al.                 | 315 | 171 | CERAD Word List                                             | Unspecified | Unclear | No  | Raw <         | 84 (78-89)   | 80 (75-84)  |

|                                  |        |       |                                                          |          |         |     |                            |                 |            |
|----------------------------------|--------|-------|----------------------------------------------------------|----------|---------|-----|----------------------------|-----------------|------------|
| (2012)                           |        |       | Delayed Recall %<br>Saving – Finnish                     |          |         |     | 75%                        |                 |            |
| Testa et al. (2004)              | 409    | 306   | AVLT Percent<br>Retention                                | Both     | No      | No  | MOANS =<br>7 <sub>ss</sub> | 84 (80-88)      | 79 (75-83) |
| Welsh et al. (1991)              | 49     | 147   | CERAD Word List<br>Delayed Recall %<br>Saving            | Probable | Unclear | Yes | SD < 2                     | 67 (59-74)      | 96 (86-99) |
| <b>Delayed Story Free Recall</b> |        |       |                                                          |          |         |     |                            |                 |            |
| Baek et al. (2012)               | 53     | 72    | Korean Story Recall<br>Test – 20 minute<br>Delay         | Probable | Unclear | No  | Raw 6/7                    | 88 (79-94)      | 73 (60-83) |
| Chapman et al.<br>(2016)         | 10,741 | 6,814 | WMS-R Logical<br>Memory Ila (A4<br>Trial)                | Both     | Unclear | No  | Raw = 6                    | 89 (88-90)      | 91 (90-92) |
| Chapman et al.<br>(2016)         | 2,315  | 995   | WMS-IV Logical<br>Memory II<br>(BAN2401; 50-64 yo)       | Both     | Unclear | No  | Raw = 15                   | 99 (98-<br>100) | 28 (26-30) |
| Chapman et al.<br>(2016)         | 2,092  | 722   | WMS-IV Logical<br>Memory II<br>(BAN2401; 65-69 yo)       | Both     | Unclear | No  | Raw = 12                   | 99 (98-<br>100) | 52 (48-56) |
| Chapman et al.<br>(2016)         | 2,083  | 1,082 | WMS Logical<br>Memory II (BAN2401<br>Trial; 70-74 yo)    | Both     | Unclear | No  | Raw = 11                   | 97 (96-98)      | 57 (55-59) |
| Chapman et al.<br>(2016)         | 1,824  | 1,562 | WMS-IV Logical<br>Memory II<br>(BAN2401; 75-79 yo)       | Both     | Unclear | No  | Raw = 9                    | 96 (95-97)      | 70 (68-72) |
| Chapman et al.<br>(2016)         | 2,212  | 2,263 | WMS-IV Logical<br>Memo Both ry II<br>(BAN2401; 80-90 yo) | Both     | Unclear | No  | Raw = 7                    | 94 (93-95)      | 81 (79-83) |
| Chapman et al.<br>(2016)         | 6,583  | 3,118 | WMS-R Logical<br>Memory Ila (ADNI 2,<br>16+ yrs of ed)   | Both     | Unclear | No  | Raw = 8                    | 92 (91-93)      | 91 (90-92) |
| Chapman et al.<br>(2016)         | 4,061  | 3,518 | WMS-R Logical<br>Memory Ila (ADNI 2,<br>8-15 yrs of ed)  | Both     | Unclear | No  | Raw = 4                    | 84 (83-85)      | 95 (94-96) |
| Chapman et al.                   | 51     | 143   | WMS-R Logical                                            | Both     | Unclear | No  | Raw = 2                    | 78 (71-84)      | 88 (76-94) |

|                                   |     |        |                                                               |             |         |     |                  |             |             |
|-----------------------------------|-----|--------|---------------------------------------------------------------|-------------|---------|-----|------------------|-------------|-------------|
| (2016)                            |     |        | Memory Ila (ADNI 2, 0-7 yrs of ed)                            |             |         |     |                  |             |             |
| Duff et al. (2008)                | 69  | 69     | RBANS Story Recall                                            | Both        | Yes     | No  | SD = -1.5        | 97 (89-100) | 92 (83-97)  |
| Salmon et al. (2002) <sup>°</sup> | 98  | 98     | WMS Logical Memory                                            | Both        | Yes     | No  | Raw < 10         | 87 (79-92)  | 89 (81-94)  |
| Shi et al. (2014)                 | 249 | 97     | The Adult Memory and information Processing Battery - Chinese | Probable    | No      | No  | Raw = 10.5       | 98 (93-99)  | 94 (90-96)  |
| <b>Delayed Story Retention</b>    |     |        |                                                               |             |         |     |                  |             |             |
| Clark et al. (2010)               | 20  | 73     | RBANS Story Retention                                         | Probable    | Unclear | No  | Raw < 70%        | 90 (81-96)  | 95 (75-100) |
| Testa et al. (2004)               | 409 | 306    | WMS – R (1987) Logical Memory Percent Retention               | Both        | No      | No  | MOANS = 5 ss     | 76 (71-81)  | 86 (82-89)  |
| <b>Delayed Visual Free Recall</b> |     |        |                                                               |             |         |     |                  |             |             |
| Cahn et al. (1995)                | 235 | 39     | WMS Visual Reproduction–Delayed Recall                        | Both        | No      | Yes | Raw = 3          | 87 (73-94)  | 87 (82-91)  |
| Duff et al. (2008)                | 69  | 69     | RBANS Figure Recall                                           | Both        | Yes     | No  | SD = -1.5        | 92 (83-98)  | 92 (83-97)  |
| Ivanou et al. (2005)              | 22  | 22     | “Shapes” Test                                                 | Probable    | No      | No  | SD < -1.96       | 94 (76-99)  | 94 (76-99)  |
| Parra et al. (2011)               | 29  | 22 FAD | Rey Osterreith Figure Recall                                  | Unspecified | No      | No  | None reported    | 91 (72-98)  | 97 (83-100) |
| Parra et al. (2010) <sup>°</sup>  | 30  | 22     | Rey Osterreith Figure Recall                                  | Unspecified | No      | Yes | SD<= -2, Raw = 6 | 77 (57-90)  | 97 (83-99)  |
| Salmon et al. (2002) <sup>°</sup> | 98  | 98     | WMS Visual Reproduction–Delayed Recall                        | Both        | Yes     | No  | Raw < 4          | 87 (79-92)  | 86 (78-92)  |
| Takechi & Dodge (2010)            | 54  | 128    | Scenery Picture Memory Test – Picture 1                       | Unspecified | No      | No  | Raw <= 9         | 85 (78-90)  | 89 (78-95)  |
| Takechi & Dodge (2010)            | 54  | 128    | Scenery Picture Memory Test – Picture 2                       | Unspecified | No      | No  | Raw <= 12        | 84 (77-90)  | 91 (80-96)  |
| <b>Delayed Visual Retention</b>   |     |        |                                                               |             |         |     |                  |             |             |

|                         |     |     |                                               |             |         |     |           |            |            |
|-------------------------|-----|-----|-----------------------------------------------|-------------|---------|-----|-----------|------------|------------|
| Cahn et al. (1995)      | 238 | 45  | WMS Visual Reproduction                       | Both        | No      | Yes | Raw < 30% | 74 (60-85) | 93 (89-96) |
| Sotaniemi et al. (2012) | 315 | 171 | CERAD Delayed Constructional Praxis % Savings | Unspecified | Unclear | No  | Raw < 65% | 71 (64-77) | 75 (70-79) |
| <b>Other Delayed</b>    |     |     |                                               |             |         |     |           |            |            |
| Duff et al. (2008)      | 69  | 69  | RBANS Delayed Memory Index                    | Both        | Yes     | No  | SD = -1.5 | 92 (83-98) | 92 (83-97) |

### Associative Learning

| Author (Year)                         | HC  | AD     | Measure Name                            | AD Diagnostic Threshold | Used in DX? | 2x2 data | Cutoff            | Sns (CI <sub>95</sub> ) | Spec (CI <sub>95</sub> ) |
|---------------------------------------|-----|--------|-----------------------------------------|-------------------------|-------------|----------|-------------------|-------------------------|--------------------------|
| Lindeboom et al. (2002)               | 204 | 24     | Visual Association Test                 | Probable                | No          | No       | Raw ≤ 3           | 83 (64-93)              | 91 (86-94)               |
| Lowndes et al. (2008)                 | 55  | 22     | Verbal Paired Associate-Total Learning  | Probable                | No          | No       | Not reported      | 86 (66-95)              | 100 (93-100)             |
| Lowndes et al. (2008)                 | 55  | 22     | Verbal Paired Cued-Total Learning       | Probable                | No          | No       | Not reported      | 86 (66-95)              | 96 (87-99)               |
| O'Connell et al. (2004)               | 16  | 34     | CANTAB-Paired Associate Learning        | Probable                | No          | Yes      | Raw ≥ 32 errors   | 68 (51-81)              | 100 (81-100)             |
| Parra et al. (2010) <sup>c</sup>      | 30  | 22     | WMS Verbal Paired Associates            | Unspecified             | No          | Yes      | SD ≤ -2, Raw = 11 | 82 (61-93)              | 77 (59-88)               |
| Parra et al. (2010) <sup>c</sup>      | 30  | 22     | Visual STM Binding                      | Unspecified             | No          | Yes      | Raw = 73.6        | 77 (60-95)              | 83 (70-97)               |
| Parra et al. (2011)                   | 14  | 14 SAD | Bound Colours                           | Unspecified             | No          | No       | Raw ≤ 66          | 79 (53-93)              | 79 (53-93)               |
| Parra et al. (2011)                   | 29  | 22 FAD | Bound Colours                           | Unspecified             | No          | No       | Raw ≤ 69          | 77 (56-90)              | 86 (69-94)               |
| Parra et al. (2011)                   | 29  | 22 FAD | Paired Associate Learning               | Unspecified             | No          | No       | Raw ≤ 9           | 77 (56-90)              | 79 (61-90)               |
| Storandt & Morris (2010) <sup>d</sup> | 23  | 55     | WMS Associate Learning Immediate Recall | Unspecified             | No          | No       | SD = -0.5         | 62 (54-69)              | 70 (53-83)               |
| Vacante et al. (2013)                 | 40  | 18     | The Placing Test Paper and Pencil       | Unspecified             | No          | No       | Raw = 13.5        | 89 (67-97)              | 79 (64-88)               |

|                       |    |    |                                                       |             |    |    |            |            |            |
|-----------------------|----|----|-------------------------------------------------------|-------------|----|----|------------|------------|------------|
| Vacante et al. (2013) | 40 | 18 | The Placing Test<br>Computerized Total                | Unspecified | No | No | Raw = 15.5 | 89 (67-97) | 93 (81-98) |
| Vacante et al. (2013) | 40 | 18 | The Placing Test<br>Computerized Objects<br>and Faces | Unspecified | No | No | Raw = 11.5 | 94 (74-99) | 79 (64-88) |

**Other**

| Author (Year)                | HC  | AD  | Measure Name                              | AD<br>Diagnostic<br>Threshold | Used in<br>Dx? | 2x2<br>data | Cutoff           | Sns (CI <sub>95</sub> ) | Spec (CI <sub>95</sub> ) |
|------------------------------|-----|-----|-------------------------------------------|-------------------------------|----------------|-------------|------------------|-------------------------|--------------------------|
| <b>Recognition</b>           |     |     |                                           |                               |                |             |                  |                         |                          |
| Baek et al. (2012)           | 53  | 72  | Korean HVLT -<br>Recognition              | Probable                      | Unclear        | No          | Raw 19/20        | 72 (61-81)              | 75 (62-85)               |
| Baek et al. (2012)           | 53  | 72  | Korean Story Recall<br>Test - Recognition | Probable                      | Unclear        | No          | Raw 7/8          | 70 (59-79)              | 76 (63-85)               |
| Cahn et al. (1995)           | 236 | 42  | CERAD Word List<br>Recognition            | Both                          | No             | Yes         | Raw < 18         | 60 (45-73)              | 91 (87-94)               |
| Diesfeldt (1990)             | 45  | 44  | RMT Words                                 | Probable                      | No             | No          | Raw<br><= 40     | 89 (76-95)              | 87 (74-94)               |
| Diesfeldt (1990)             | 45  | 44  | RMT Faces                                 | Probable                      | No             | No          | Raw <= 34        | 89 (76-95)              | 89 (76-95)               |
| Duff et al. (2008)           | 69  | 69  | RBANS Recognition                         | Both                          | Yes            | No          | SD = -1.5,<br>-2 | 80 (68-89)              | 93 (85-98)               |
| Ewers et al. (2012)          | 101 | 81  | AVLT –Recognition<br>Memory               | Unspecified                   | No             | No          | None<br>reported | 65 (54-74)              | 91 (84-95)               |
| Ivanoiu et al. (2005)        | 22  | 22  | “Doors” Test Part B                       | Probable                      | No             | No          | SD < -1.96       | 64 (43-81)              | 86 (66-95)               |
| Ivanoiu et al. (2005)        | 22  | 22  | “Doors” Test Part A                       | Probable                      | No             | No          | SD < -1.96       | 71 (50-86)              | 86 (66-95)               |
| Karrasch et al. (2005)       | 15  | 15  | CERAD Word List –<br>Finnish              | Probable                      | Unclear        | No          | Raw <= 92        | 80 (55-93)              | Unavailable              |
| Loewenstein et al.<br>(2004) | 53  | 26  | FOME – Total<br>Recognition               | Probable                      | No             | No          | None<br>reported | 77 (58-89)              | 100 (93-<br>100)         |
| Sotaniemi et al.<br>(2012)   | 315 | 171 | CERAD Word List –<br>Finnish              | Unspecified                   | Unclear        | No          | Raw <<br>95%     | 86 (80-90)              | 78 (73-82)               |
| Welsh et al. (1991)          | 49  | 147 | CERAD Word List<br>Recognition – Yes      | Probable                      | Yes            | Yes         | SD < -2          | 54 (46-62)              | 96 (86-99)               |
| Welsh et al. (1991)          | 49  | 147 | CERAD Word List<br>Recognition – No       | Probable                      | Yes            | Yes         | SD < -2          | 35 (28-43)              | 98 (89-100)              |

**Combined and/or Interference Scores; Miscellaneous**

|                           |     |     |                                                        |             |         |     |               |            |              |
|---------------------------|-----|-----|--------------------------------------------------------|-------------|---------|-----|---------------|------------|--------------|
| Ivnik et al. (2000)       | 432 | 232 | MCFS Retention Factor Score                            | Both        | Yes     | No  | Std = 86      | 85 (80-89) | 92 (89-94)   |
| Loewenstein et al. (2004) | 53  | 26  | FOME - Combined Interference                           | Probable    | No      | No  | None reported | 85 (67-94) | 96 (87-99)   |
| Marcone et al. (2016)     | 49  | 41  | Envelope Task – Retrospective Component                | Probable    | No      | No  | Raw <= 1/2    | 85 (71-93) | 98 (89-100)  |
| Marcone et al. (2016)     | 49  | 41  | Envelope Task – Prospective Component                  | Probable    | No      | No  | Raw <= 1/2    | 93 (81-98) | 86 (74-93)   |
| Paulsen et al. (1995)     | 20  | 20  | Buschke SRT – Total Recall (from STM + LTM)            | Unspecified | No      | No  | None Reported | 95 (76-99) | 100 (84-100) |
| Salmon et al. (1989)      | 24  | 39  | Recognition Span Test Overall                          | Probable    | No      | Yes | None reported | 95 (83-99) | 96 (80-99)   |
| Shi et al. (2012)         | 249 | 97  | HVLT Immediate Word List Total Score + Y/N Recognition | Probable    | No      | No  | Raw = 25.5    | 96 (89-98) | 94 (90-96)   |
| Sotaniemi et al. (2012)   | 315 | 171 | CERAD Delayed Recall + Word List Recognition           | Unspecified | Unclear | No  | Raw < 22      | 90 (85-94) | 93 (90-95)   |
| Troster et al. (1993)     | 69  | 58  | WMS-R Logical Memory + Visual Reproduction % savings   | Probable    | No      | No  | None reported | 88 (77-94) | 99 (93-100)  |

<sup>a</sup> DSM-IV criteria and NINCDS-ADRDA used for diagnosis

<sup>b</sup> DSM – IV Criteria for diagnosis, not NINCDS

<sup>c</sup> familial AD E280A mutation used in diagnosis as well as NINCDS-ADRDA criteria

<sup>d</sup> Neuropathologic verification of AD using Khachaturian diagnostic criteria (1995) as modified by McKeel et al. (2004)

<sup>e</sup> Neuropathologic verification following NINCDS-ADRDA criteria for probable or possible AD

*Notes.* The column “AD Diagnostic Threshold” defines if AD inclusion criteria was a diagnosis of “Probable AD,” “Probable and Possible AD” (“both”), or if inclusion criteria was NINCDS only, and unspecified as to probable or possible AD.

Abbreviations. HC = Health Control; AD = Alzheimer's disease; Dx = Diagnosis; Sens = Sensitivity; Spec = Specificity; CI<sub>95</sub> = 95% Confidence Interval; HVLt-R = Hopkins Verbal Learning Test - Revised; CERAD = Consortium to Establish a Registry for Alzheimer's Disease; RBANS = Repeatable Battery for the Assessment of Neuropsychological Status; SD = Standard Deviation; AVLT = Auditory Verbal Learning Test; NAB = Neuropsychological Assessment Battery; T= t-score; CVLT-ii = California Verbal Learning Test – 2<sup>nd</sup> edition; ADAS-Cog = Alzheimer's Disease Assessment Scale – Cognitive Subscale; RI-48= Rappel Indice – 48; FCSRT = Free and Cued Selective Reminding Test; WMS (-Revised) = Wechsler Memory Scale (– Revised); SAD = Sporadic Alzheimer's Disease; FAD = Familial Alzheimer's Disease (i.e., familial AD E280A mutation); MCFS = Mayo Cognitive Factor Scales; SRT = Selective Reminding Test; WRT = Word Recall Task; FOME = Fuld Object Memory Evaluation; MOANS = Mayo's Older Americans Normative Studies; CANTAB-PAL = Cambridge Neuropsychological Test Automated Battery - Paired Associates Learning; STM = Short-term Memory; LTM = long-term memory; RMT = Recognition Memory Test; DSM – IV = Diagnostic and Statistical Manual – Fourth edition; NINCDS-ADRDA = National Institute of Neurological and Communicative Disorders and the Alzheimer's Disease and Related Disorders Association

Table ii: Studies comparing cognitive scores between patients with Alzheimer's Disease and other dementias (AD vs. Others).

| Author (Year)                                                  | Other      | AD | Measure Name                               | AD Diagnostic Threshold | Used in Dx? | 2x2 data | Cutoff        | Sns (CI <sub>95</sub> ) | Spec (CI <sub>95</sub> ) |
|----------------------------------------------------------------|------------|----|--------------------------------------------|-------------------------|-------------|----------|---------------|-------------------------|--------------------------|
| <b>Immediate List Cued and/or Selective Reminding Paradigm</b> |            |    |                                            |                         |             |          |               |                         |                          |
| Paulsen et al. (1995)                                          | HD=20      | 20 | Buschke SRT – Recall from STM              | Unspecified             | No          | No       | None Reported | 65 (43-82)              | 55 (34-74)               |
| <b>Immediate Story Free Recall</b>                             |            |    |                                            |                         |             |          |               |                         |                          |
| McDermott & DeFilippis (2010)                                  | SVaD=29    | 39 | RBANS Story Memory                         | Probable                | Unclear     | No       | SD < 1.5      | 85 (71-93)              | 52 (35-69)               |
| <b>Immediate Visual Free Recall</b>                            |            |    |                                            |                         |             |          |               |                         |                          |
| Pengas et al. (2010)                                           | SD = 15    | 22 | Visual Route Learning Test                 | Probable                | Unclear     | No       | None reported | 95 (78-99)              | 80 (55-93)               |
| <b>Other Immediate Recall</b>                                  |            |    |                                            |                         |             |          |               |                         |                          |
| Gavett et al. (2012)                                           | Non-AD=211 | 65 | NAB Daily Living Memory – Immediate recall | Both                    | No          | No       | Raw < 32      | 86 (76-92)              | 90 (85-93)               |
| <b>Delayed Recall</b>                                          |            |    |                                            |                         |             |          |               |                         |                          |
| Author (Year)                                                  | HC         | AD | Measure Name                               | AD Diagnostic Threshold | Used in Dx? | 2x2 data | Cutoff        | Sns (CI <sub>95</sub> ) | Spec (CI <sub>95</sub> ) |
| <b>Delayed List Free Recall</b>                                |            |    |                                            |                         |             |          |               |                         |                          |
| McDermott & DeFilippis (2010)                                  | SVaD =29   | 39 | RBANS List Recall                          | Probable                | Unclear     | No       | SD < 1.5      | 80 (65-90)              | 48 (31-65)               |
| O'Carroll et al. (1997)                                        | Dep=50     | 50 | Delayed Word Recall test- Free Recall      | Probable                | No          | No       | Raw < 3       | 96 (86-99)              | 69 (55-80)               |
| <b>Delayed List Cued and/or Selective Reminding Paradigm</b>   |            |    |                                            |                         |             |          |               |                         |                          |
| Paulsen et al. (1995)                                          | HD=20      | 20 | Buschke SRT – Recall from LTM              | Unspecified             | No          | No       | None Reported | 75 (53-89)              | 60 (39-78)               |
| Saka & Elibol (2009)                                           | PD=26      | 32 | Enhanced Cued Recall                       | Probable                | Unclear     | No       | Raw <= 26     | 72 (53-86)              | 85 (65-96)               |
| <b>Delayed Story Free Recall</b>                               |            |    |                                            |                         |             |          |               |                         |                          |
| McDermott & DeFilippis (2010)                                  | SVaD=29    | 39 | RBANS Story Recall                         | Probable                | Unclear     | No       | SD < 1.5      | 77 (62-87)              | 62 (44-77)               |

| <b>Delayed Visual Free Recall</b> |             |    |                                          |          |         |    |          |            |            |
|-----------------------------------|-------------|----|------------------------------------------|----------|---------|----|----------|------------|------------|
| Matioli & Caramelli (2010)        | VaD =15     | 15 | Delayed recall of 10 simple figures      | Probable | No      | No | Raw < 4  | 87 (63-96) | 67 (42-85) |
| McDermott & DeFilippis (2010)     | SVaD =29    | 39 | RBANS Figure Recall                      | Probable | Unclear | No | SD < 1.5 | 77 (62-87) | 52 (35-69) |
| <b>Other Delayed</b>              |             |    |                                          |          |         |    |          |            |            |
| Gavett et al. (2012)              | Non-AD =211 | 65 | NAB Daily Living Memory – Delayed Recall | Both     | No      | No | Raw < 8  | 97 (90-99) | 88 (83-92) |
| McDermott & DeFilippis (2010)     | SVaD= 29    | 39 | RBANS Delayed Memory Index               | Probable | Unclear | No | SD < 1.5 | 92 (79-97) | 61 (43-76) |

| <b>Other</b>                        |             |             |                                                      |                                |                    |                 |                            |                              |                               |
|-------------------------------------|-------------|-------------|------------------------------------------------------|--------------------------------|--------------------|-----------------|----------------------------|------------------------------|-------------------------------|
| <b>Author (Year)</b>                | <b>HC</b>   | <b>AD</b>   | <b>Measure Name</b>                                  | <b>AD Diagnostic Threshold</b> | <b>Used in Dx?</b> | <b>2x2 data</b> | <b>Cutoff</b>              | <b>Sns (CI<sub>95</sub>)</b> | <b>Spec (CI<sub>95</sub>)</b> |
| <b>Recognition</b>                  |             |             |                                                      |                                |                    |                 |                            |                              |                               |
| McDermott & DeFilippis (2010)       | SVaD =29    | 39          | RBANS List Recognition                               | Probable                       | Unclear            | No              | SD < 1.5                   | 87 (73-94)                   | 59 (41-75)                    |
| O'Carroll et al. (1997)             | Dep=50      | 50          | Delayed Word Recall- Recognition                     | Probable                       | No                 | No              | Raw < 10                   | 94 (84-98)                   | 66 (52-78)                    |
| Schmidtke et al. (2002)             | SVD =18     | 72          | CERAD List Recognition/ AVLT List Recognition        | Probable                       | No                 | No              | CERAD raw < 5 AVLT raw < 9 | 94 (86-98)                   | 47 (27-68)                    |
| <b>Combined/Interference Scores</b> |             |             |                                                      |                                |                    |                 |                            |                              |                               |
| Oda et al. (2009)                   | DLB =26     | 78          | Combined WMS-R Logical Memory II and Object Assembly | Probable                       | No                 | No              | z < -1.23                  | 81 (66-96)                   | 76 (66-85)                    |
| Paulsen et al. (1995)               | HD=20       | 20          | Buschke SRT – Total Recall (from STM + LTM)          | Unspecified                    | No                 | No              | None Reported              | 65 (44-82)                   | 65 (44-82)                    |
| Troster et al. (1993)               | Mod HD = 14 | Mod AD = 43 | WMS-R Logical Memory + Visual Reproduction % Savings | Probable                       | No                 | No              | None Reported              | 86 (73-93)                   | 36 (17-61)                    |
| Troster et al. (1993)               | Mild        | Mild        | WMS-R Logical                                        | Probable                       | No                 | No              | None                       | 80 (55-93)                   | 88 (70-96)                    |

|  |         |         |                                              |  |  |  |          |  |  |
|--|---------|---------|----------------------------------------------|--|--|--|----------|--|--|
|  | HD = 24 | AD = 15 | Memory + Visual<br>Reproduction %<br>Savings |  |  |  | Reported |  |  |
|--|---------|---------|----------------------------------------------|--|--|--|----------|--|--|

*Notes.* The column “AD Diagnostic Threshold” defines if AD inclusion criteria was a diagnosis of “Probable AD,” “Probable and Possible AD” (“both”), or if inclusion criteria was NINCDS only, and unspecified as to probable or possible AD.

*Abbreviations.* HC = Healthy Control; AD = Alzheimer’s disease; Dx = Diagnosis; Sns = Sensitivity; Spec = Specificity; CI<sub>95</sub> = 95% Confidence Interval; SRT = Selective Reminding Paradigm; STM = Short-term memory; HD = Huntington’s Disease Dementia; SVaD = Subcortical Vascular Dementia; RBANS = Repeatable Battery for the Assessment of Neuropsychological Status; SD = Standard Deviation; SemD = Semantic Dementia; Non-AD = health controls + MCI + other dementia + ambiguous non-MCI; NAB = Neuropsychological Assessment Battery; Dep = Depression; PD = Parkinson’s Disease; VaD = Vascular Dementia; SVaD = Subcortical vascular dementia; LTM = Long-term Memory; SVD = small vessel disease; CERAD = Consortium to Establish a Registry for Alzheimer’s Disease; AVLT = Auditory Verbal Learning Test; WMS – R = Wechsler Memory Scales – Revised; DLB = Dementia of Lewy bodies

Table iii. Studies comparing cognitive scores between normal elderly and patients with Mild Cognitive Impairment (MCI vs. HC)

| <b>Immediate Recall</b>           |           |            |                                               |                                      |                   |                 |               |                              |                               |
|-----------------------------------|-----------|------------|-----------------------------------------------|--------------------------------------|-------------------|-----------------|---------------|------------------------------|-------------------------------|
| <b>Author (Year)</b>              | <b>HC</b> | <b>MCI</b> | <b>Measure Name</b>                           | <b>Diagnostic criteria</b>           | <b>Used in Dx</b> | <b>2x2 data</b> | <b>Cutoff</b> | <b>Sns (CI<sub>95</sub>)</b> | <b>Spec (CI<sub>95</sub>)</b> |
| <b>Immediate List Free Recall</b> |           |            |                                               |                                      |                   |                 |               |                              |                               |
| Baek et al. (2012)                | 53        | 127        | Seoul Verbal Learning Test                    | Petersen et al. 2001                 | Unclear           | No              | Raw ≤ 19      | 77 (69-83)                   | 70 (57-81)                    |
| Blanco-Campal et al. (2009)       | 21        | 19         | CERAD Word List Learning                      | Portet et al. 2006                   | No                | No              | Raw < 19      | 83 (61-94)                   | 76 (55-89)                    |
| De Jager et al. (2003)            | 51        | 29         | HVLT Total Recall Score                       | Petersen et al. (2001)               | No                | No              | Raw = 21.5    | 76 (58-88)                   | 78 (67-89)                    |
| Duff et al. (2010)                | 71        | 72         | RBANS List Learning Total                     | Petersen et al. 1999                 | No                | No              | SD = -1       | 33 (23-45)                   | 90 (81-96)                    |
| Gavett et al. (2009)              | 98        | 29         | NAB List Learning List A Immediate Recall     | Winblad et al. 2004                  | No                | No              | T ≤ 46        | 76 (57-90)                   | 69 (59-78)                    |
| Gavett et al. (2009)              | 98        | 29         | NAB List Learning List B Immediate Recall     | Winblad et al. 2004                  | No                | No              | T ≤ 47        | 69 (49-85)                   | 62 (52-72)                    |
| Gonzalez-Palau et al. (2013)      | 109       | 132        | HVLT Word List Learning - Spanish             | Petersen et al. 1999                 | No                | No              | Raw ≤ 14      | 70 (62-77)                   | 74 (65-81)                    |
| Karrasch et al. (2005)            | 15        | 15         | CERAD Word List Learning – Finnish            | Petersen et al. 2001                 | Unclear           | No              | Raw = 20      | 73 (48-89)                   | Unavailable                   |
| Parra et al. (2012)               | 10        | 10         | Word List Immediate Recall                    | Petersen (2004)                      | No                | No              | Raw ≤ 17      | 80 (49-94)                   | 80 (49-94)                    |
| Pike et al. (2013)                | 77        | 77         | CVLT-II Trials 1-5                            | Petersen (2004)                      | No                | No              | Raw < 45      | 72 (61-81)                   | 99 (93-100)                   |
| Rabin et al. (2009)               | 51        | 38         | CVLT-II Trials 1-5                            | Petersen, 2004; Petersen et al. 2001 | No                | No              | None reported | 90 (77-96)                   | 84 (72-92)                    |
| Rabin et al. (2009)               | 51        | 38         | Memory and Aging Telephone Screen Learning    | Petersen, 2004; Petersen et al. 2001 | No                | No              | None reported | 84 (69-92)                   | 71 (57-82)                    |
| Ritter et al. (2006)              | 25        | 20         | Word list immediate recall (task unspecified) | Petersen et al. 2001                 | Yes               | No              | SD = -1.5     | 36 (19-58)                   | 93 (76-98)                    |
| Schrijnemaekers et                | 54        | 19         | HVLT Word List                                | Petersen et al. 1999                 | No                | No              | Raw = 24.5    | 82 (60-93)                   | 79 (66-88)                    |

|                                                                |     |     |                                                          |                                            |         |    |               |            |            |
|----------------------------------------------------------------|-----|-----|----------------------------------------------------------|--------------------------------------------|---------|----|---------------|------------|------------|
| al. (2006)                                                     |     |     | Learning                                                 |                                            |         |    |               |            |            |
| Shankle et al. (2005)                                          | 119 | 95  | CERAD Word List Learning                                 | CDR                                        | No      | No | None reported | 85 (83-87) | 91 (90-92) |
| Shi et al. (2012)                                              | 249 | 134 | HVLT Word List Learning - Chinese                        | Petersen et al. 2001                       | No      | No | Raw = 21.5    | 69 (61-76) | 71 (65-76) |
| <b>Immediate List Cued and/or Selective Reminding Paradigm</b> |     |     |                                                          |                                            |         |    |               |            |            |
| Crocco et al. (2014)                                           | 47  | 34  | LASSI-L List A Cued Recall                               | Petersen (2004)                            | Unclear | No | None reported | 88 (73-95) | 89 (77-95) |
| Lemos et al. (2015)                                            | 101 | 100 | FCSRT Portuguese                                         | Albert et al. 2011, Petersen 2004, 2007    | Unclear | No | Raw ≤ 35      | 72 (63-80) | 83 (75-89) |
| Park et al. (2016)                                             | 34  | 29  | RI-24 (adaptation of RI-48) – Immediate Cued Recall      | Petersen et al. (1997)                     | No      | No | Raw < 16.5    | 59 (41-75) | 77 (61-88) |
| <b>Immediate Story Free Recall</b>                             |     |     |                                                          |                                            |         |    |               |            |            |
| Baek et al. (2011)                                             | 53  | 112 | Korean Story Recall Test                                 | Petersen et al. 2001                       | Unclear | No | Raw ≤ 6       | 68 (59-76) | 55 (42-68) |
| Baek et al. (2012)                                             | 53  | 127 | Korean Story Recall Test                                 | Petersen et al. 2001                       | Unclear | No | Raw ≤ 12      | 70 (62-77) | 54 (41-67) |
| Blanco-Campal et al. (2009)                                    | 21  | 19  | Rivermead Behavioral Memory Test - Paragraph Recall Test | Portet et al. 2006                         | No      | No | Raw < 9       | 82 (60-93) | 71 (50-86) |
| Duff et al. (2010)                                             | 71  | 72  | RBANS Story Memory                                       | Petersen et al. 1999                       | No      | No | SD = -1       | 25 (16-37) | 82 (71-90) |
| Loewenstein et al. (2006)                                      | 80  | 23  | WMS-III Logical Memory I                                 | NINCDS-ADRDA without functional impairment | No      | No | SD = -1.5     | 70 (50-85) | 92 (84-96) |
| Pike et al. (2013)                                             | 77  | 77  | WMS-III Logical Memory I                                 | Petersen (2004)                            | No      | No | Raw < 25      | 93 (85-97) | 68 (57-77) |
| Rabin et al. (2009)                                            | 51  | 38  | WMS-III Logical Memory I                                 | Petersen, 2004; Petersen et al. 2001       | No      | No | None reported | 86 (72-94) | 66 (52-77) |
| <b>Immediate Visual Free Recall</b>                            |     |     |                                                          |                                            |         |    |               |            |            |
| Loewenstein et al. (2006)                                      | 80  | 23  | WMS-III Immediate Visual Reproduction                    | NINCDS-ADRDA without functional impairment | No      | No | SD = -1.5     | 44 (26-64) | 91 (83-96) |

| Other Immediate Recall |    |     |                                   |                      |    |    |           |            |            |
|------------------------|----|-----|-----------------------------------|----------------------|----|----|-----------|------------|------------|
| Duff et al. (2010)     | 71 | 72  | RBANS Immediate Memory Index      | Petersen et al. 1999 | No | No | SD = -1   | 35 (24-47) | 85 (74-92) |
| Gavett et al. (2012)   | 75 | 113 | NAB Daily Living Memory Immediate | Winblad et al. 2004  | No | No | Raw <= 32 | 86 (78-91) | 90 (81-95) |

| Delayed Recall |    |     |              |                     |            |          |        |                         |                          |
|----------------|----|-----|--------------|---------------------|------------|----------|--------|-------------------------|--------------------------|
| Author (Year)  | HC | MCI | Measure Name | Diagnostic Criteria | Used in Dx | 2x2 data | Cutoff | Sns (CI <sub>95</sub> ) | Spec (CI <sub>95</sub> ) |

| Delayed List Free Recall     |     |     |                                            |                                         |         |     |               |            |             |
|------------------------------|-----|-----|--------------------------------------------|-----------------------------------------|---------|-----|---------------|------------|-------------|
| Baek et al. (2012)           | 53  | 127 | Seoul Verbal Learning Test 20-Minute Delay | Petersen et al. 2001                    | Unclear | No  | Raw <= 5      | 70 (62-77) | 79 (66-88)  |
| Blanco-Campal et al. (2009)  | 21  | 19  | CERAD Word List Delay                      | Portet et al. 2006                      | No      | No  | Raw < 6       | 72 (50-87) | 86 (66-95)  |
| Chandler et al. (2005)       | 95  | 60  | CERAD Word List Delay                      | Petersen et al. 1999                    | No      | No  | Raw = 6.5     | 81 (69-89) | 63 (53-72)  |
| Delprado et al. (2012)       | 84  | 84  | CVLT-II Long Delay Free Recall             | Petersen, 2004                          | No      | No  | Raw < 8       | 88 (79-93) | 84 (75-90)  |
| Duff et al. (2010)           | 71  | 72  | RBANS List Recall                          | Petersen et al. 1999                    | No      | No  | SD = -1       | 40 (29-53) | 86 (76-93)  |
| Gavett et al. (2009)         | 98  | 29  | NAB List Learning List A Short Delay       | Winblad et al. 2004                     | No      | No  | T <= 48       | 86 (68-96) | 72 (63-81)  |
| Gavett et al. (2009)         | 98  | 29  | NAB List Learning List A Long Delay        | Winblad et al. 2004                     | No      | No  | T <= 40       | 62 (42-79) | 97 (91-99)  |
| Gonzalez-Palau et al. (2013) | 109 | 132 | HVLT Word List Delay Recall - Spanish      | Petersen et al. 1999                    | No      | No  | Raw <= 3      | 75 (67-82) | 81 (73-87)  |
| Junkkila et al. (2012)       | 22  | 17  | CERAD Word List Delay                      | Petersen et al. (2001); Petersen (2004) | No      | Yes | Raw = 6       | 65 (42-83) | 86 (66-95)  |
| Karrasch et al. (2005)       | 15  | 15  | CERAD Word List Delay – Finnish            | Petersen et al. 2001                    | Unclear | No  | Raw = 6       | 26 (10-51) | Unavailable |
| Loewenstein et al. (2004)    | 53  | 53  | FOME Bag A Recall                          | Petersen et al. 2001                    | No      | No  | None reported | 74 (61-84) | 79 (66-88)  |
| Loewenstein et al. (2004)    | 53  | 53  | FOME Bag A 20-minute Recall                | Petersen et al. 2001                    | No      | No  | None reported | 72 (59-82) | 79 (66-88)  |

|                                  |        |       |                                                          |                                      |         |    |               |            |            |
|----------------------------------|--------|-------|----------------------------------------------------------|--------------------------------------|---------|----|---------------|------------|------------|
| Park et al. (2016)               | 34     | 29    | ADAS-cog WRT – Korean Version                            | Petersen et al. (1997)               | No      | No | Raw < 9.5     | 62 (44-77) | 50 (34-66) |
| Parra et al. (2012)              | 10     | 10    | Word List Delayed Recall                                 | Petersen (2004)                      | No      | No | Raw <= 5      | 80 (49-94) | 80 (49-94) |
| Pike et al. (2013)               | 77     | 77    | CVLT-II Short Delay Free Recall                          | Petersen (2004)                      | No      | No | Raw < 8       | 93 (85-97) | 89 (80-94) |
| Saka et al. (2006)               | 33     | 45    | Enhanced Cued Recall Test – Total Free Recall -Turkish   | Petersen et al. 2001                 | Unclear | No | Raw = 23      | 39 (17-64) | 88 (72-97) |
| Shankle et al. (2005)            | 119    | 95    | CERAD Word List Delay                                    | CDR                                  | No      | No | None reported | 82 (79-85) | 91 (89-92) |
| Rabin et al. (2009)              | 51     | 38    | CVLT-II Short Delay Free Recall                          | Petersen, 2004; Petersen et al. 2001 | No      | No | None reported | 84 (69-92) | 79 (66-88) |
| Rabin et al. (2009)              | 51     | 38    | CVLT-II Long Delay Free Recall                           | Petersen, 2004; Petersen et al. 2001 | No      | No | None reported | 88 (74-95) | 84 (72-92) |
| Rabin et al. (2009)              | 51     | 38    | Memory and Aging Telephone Screen Delay                  | Petersen, 2004; Petersen et al. 2001 | No      | No | None reported | 86 (72-94) | 82 (69-90) |
| <b>Delayed Story Free Recall</b> |        |       |                                                          |                                      |         |    |               |            |            |
| Baek et al. (2011)               | 53     | 112   | Korean Story Recall Test                                 | Petersen et al. 2001                 | Unclear | No | Raw <= 8      | 81 (73-87) | 56 (43-69) |
| Baek et al. (2012)               | 53     | 127   | Korean Story Recall Test                                 | Petersen et al. 2001                 | Unclear | No | Raw <= 10     | 70 (62-77) | 67 (54-78) |
| Blanco-Campal et al. (2009)      | 21     | 19    | Rivermead Behavioral Memory Test - Paragraph Recall Test | Portet et al. 2006                   | No      | No | Raw < 6       | 77 (55-90) | 81 (60-92) |
| Chapman et al. (2016)            | 10,741 | 5,883 | WMS-R Logical Memory IIa (A4 Trial)                      | Winblad et al. 2004                  | Unclear | No | Raw = 6       | 41 (40-42) | 91 (90-92) |
| Chapman et al. (2016)            | 2,315  | 897   | WMS-IV Logical Memory II (BAN2401 Trial; 50-64 yo)       | Winblad et al. 2004                  | Unclear | No | Raw = 15      | 92 (90-94) | 28 (26-30) |
| Chapman et al. (2016)            | 2,092  | 909   | WMS-IV Logical Memory II (BAN2401 Trial; 65-69 yo)       | Winblad et al. 2004                  | Unclear | No | Raw = 12      | 78 (75-81) | 52 (50-54) |
| Chapman et al.                   | 2,083  | 1,182 | WMS-IV Logical                                           | Winblad et al. 2004                  | Unclear | No | Raw = 11      | 78 (76-80) | 57 (55-59) |

|                           |       |       |                                                                      |                                            |         |    |               |            |            |
|---------------------------|-------|-------|----------------------------------------------------------------------|--------------------------------------------|---------|----|---------------|------------|------------|
| (2016)                    |       |       | Memory II (BAN2401 Trial; 70-74 yo)                                  |                                            |         |    |               |            |            |
| Chapman et al. (2016)     | 1,824 | 1,270 | WMS-IV Logical Memory II (BAN2401 Trial; 75-79 yo)                   | Winblad et al. 2004                        | Unclear | No | Raw = 9       | 67 (64-70) | 70 (68-72) |
| Chapman et al. (2016)     | 2,212 | 1,472 | WMS-IV Logical Memory II (BAN2401 Trial; 80-90 yo)                   | Winblad et al. 2004                        | Unclear | No | Raw = 7       | 55 (52-58) | 81 (79-83) |
| Chapman et al. (2016)     | 6,583 | 3,202 | WMS-R Logical Memory IIa (ADNI 2, 16+ years of ed)                   | Winblad et al. 2004                        | Unclear | No | Raw = 10      | 73 (71-75) | 73 (72-74) |
| Chapman et al. (2016)     | 4,061 | 2,576 | WMS-R Logical Memory IIa (ADNI 2, 8-15 years of ed)                  | Winblad et al. 2004                        | Unclear | No | Raw = 9       | 68 (66-70) | 65 (64-66) |
| Chapman et al. (2016)     | 51    | 85    | WMS-R Logical Memory IIa (ADNI 2, 0-7 years of ed)                   | Winblad et al. 2004                        | Unclear | No | Raw = 5       | 55 (44-65) | 75 (62-85) |
| Duff et al. (2010)        | 71    | 72    | RBANS Story Recall                                                   | Petersen et al. 1999                       | No      | No | SD = -1       | 26 (17-38) | 88 (80-94) |
| Loewenstein et al. (2006) | 80    | 23    | WMS-III Logical Memory II                                            | NINCDS-ADRDA without functional impairment | No      | No | SD = -1.5     | 61 (41-78) | 91 (83-96) |
| Pike et al. (2013)        | 77    | 77    | WMS-III Logical Memory II                                            | Petersen (2004)                            | No      | No | Raw < 14      | 88 (79-94) | 82 (72-89) |
| Serna et al. (2015)       | 890   | 352   | WMS-R Logical Memory IIa                                             | Winblad et al. 2004                        | No      | No | None Reported | 57 (52-62) | 71 (68-74) |
| Shi et al. (2014)         | 249   | 134   | Adult Memory and Information Processing Battery Delayed Story Recall | Portet et al. 2006                         | No      | No | Raw = 15.5    | 90 (84-94) | 80 (75-85) |
| Rabin et al. (2009)       | 51    | 38    | WMS-III Logical Memory II                                            | Petersen, 2004; Petersen et al. 2001       | No      | No | None reported | 86 (72-94) | 74 (61-84) |
| Rabin et al. (2009)       | 51    | 38    | WMS-III Logical Memory II Story A                                    | Petersen, 2004; Petersen et al. 2001       | No      | No | None reported | 92 (79-97) | 76 (63-86) |

| <b>Delayed Visual Recall</b>                                 |     |     |                                                                  |                                               |         |    |               |            |            |
|--------------------------------------------------------------|-----|-----|------------------------------------------------------------------|-----------------------------------------------|---------|----|---------------|------------|------------|
| Duff et al. (2010)                                           | 71  | 72  | RBANS Figure Recall                                              | Petersen et al. 1999                          | No      | No | SD = -1       | 40 (29-53) | 88 (79-93) |
| Loewenstein et al. (2006)                                    | 80  | 23  | WMS-III Delayed Visual Reproduction                              | NINCDS-ADRDA without functional impairment    | No      | No | SD = -1.5     | 70 (50-85) | 90 (81-95) |
| Pike et al. (2013)                                           | 77  | 77  | Rey Complex Figure 5-minute Delay                                | Petersen (2004)                               | No      | No | Raw < 8.5     | 90 (81-95) | 65 (54-75) |
| <b>Delayed List Cued and/or Selective Reminding Paradigm</b> |     |     |                                                                  |                                               |         |    |               |            |            |
| Lekeu et al. (2010)                                          | 14  | 34  | CVLT Short Delay Cued Recall                                     | Petersen et al. (2001); Winblad et al. (2004) | Unclear | No | None Reported | 88 (73-95) | 71 (45-88) |
| Lemos et al. (2015)                                          | 101 | 100 | FCSRT Portuguese                                                 | Albert et al. 2011, Petersen 2004, 2007       | Unclear | No | Raw <= 12     | 76 (67-83) | 81 (72-87) |
| Loewenstein et al. (2006)                                    | 80  | 23  | Three-trial FOME                                                 | NINCDS-ADRDA without functional impairment    | No      | No | SD = -1.5     | 78 (58-90) | 93 (85-97) |
| Park et al. (2016)                                           | 34  | 29  | RI-24 (adaptation of RI-48) – Immediate Cued Recall              | Petersen et al. (1997)                        | No      | No | Raw < 10.5    | 69 (51-83) | 82 (66-91) |
| Saka et al. (2006)                                           | 33  | 45  | Enhanced Cued Recall Test – Total Free and Cued Recall - Turkish | Petersen et al. 2001                          | Unclear | No | Raw = 42      | 50 (26-74) | 91 (76-98) |
| <b>Delayed List Retention</b>                                |     |     |                                                                  |                                               |         |    |               |            |            |
| Blanco-Campal et al. (2009)                                  | 21  | 19  | CERAD Word List Savings                                          | Portet et al. 2006                            | No      | No | Raw<70%       | 56 (35-75) | 81 (60-92) |
| Blanco-Campal et al. (2009)                                  | 21  | 19  | Rivermead Behavioral Memory Test - Paragraph Recall Test Savings | Portet et al. 2006                            | No      | No | Raw<69%       | 65 (43-82) | 90 (70-97) |
| Clark et al. (2010)                                          | 20  | 44  | RBANS List Learning Retention                                    | Petersen et al. 1999                          | Unclear | No | Raw<70%       | 82 (67-92) | 88 (74-96) |
| <b>Delayed Story Retention</b>                               |     |     |                                                                  |                                               |         |    |               |            |            |

|                             |    |     |                                 |                      |          |    |                  |            |            |
|-----------------------------|----|-----|---------------------------------|----------------------|----------|----|------------------|------------|------------|
| Clark et al. (2010)         | 20 | 44  | RBANS Story Memory Retention    | Petersen et al. 1999 | Unclear  | No | Raw<80%          | 75 (60-87) | 85 (62-97) |
| <b>Other Delayed Recall</b> |    |     |                                 |                      |          |    |                  |            |            |
| Duff et al. (2010)          | 71 | 72  | RBANS Delayed Memory Index      | Petersen et al. 1999 | No       | No | SD = -1          | 56 (43-67) | 83 (72-91) |
| Gavett et al. (2012)        | 75 | 113 | NAB Daily Living Memory Delayed | Winblad et al. 2004  | No       | No | Raw <= 8         | 97 (92-99) | 88 (79-94) |
| Karantzoulis et al. (2013)  | 81 | 81  | RBANS Delayed Memory Index      | Albert et al. (2011) | Presumed | No | Index Score < 85 | 72 (61-81) | 87 (78-93) |

### Associative Learning

| Author (Year)           | HC  | MCI | Measure Name                                      | Diagnostic Criteria                             | Used in DX | 2x2 data | Cutoff     | Sns (CI <sub>95</sub> ) | Spec (CI <sub>95</sub> ) |
|-------------------------|-----|-----|---------------------------------------------------|-------------------------------------------------|------------|----------|------------|-------------------------|--------------------------|
| Beglinger et al. (2009) | 113 | 36  | Indiana Faces in Places Test Total Recall         | Petersen et al. (1999)                          | No         | No       | Raw <= 6   | 67 (51-80)              | 63 (51-80)               |
| Beglinger et al. (2009) | 113 | 36  | Indiana Faces in Places Test Delay Hits           | Petersen et al. (1999)                          | No         | No       | Raw <= 3   | 57 (41-72)              | 70 (61-78)               |
| Buschke et al. (2017)   | 246 | 31  | Memory Binding Test                               | Revised Petersen criteria (Artero et al., 2006) | No         | No       | Raw <= 22  | 74 (55-88)              | 73 (67-79)               |
| De Jager et al. (2003)  | 51  | 29  | The Placing Test                                  | Petersen et al. (2001)                          | No         | No       | Raw = 21.5 | 70 (52-84)              | 66 (52-77)               |
| Junkkila et al. (2012)  | 22  | 17  | CANTAB Paired Associates Learning Test            | Petersen et al. (2001); Petersen (2004)         | No         | Yes      | Raw = 42   | 47 (26-69)              | 96 (79-99)               |
| Pike et al. (2013)      | 77  | 77  | WMS-IV Verbal Paired Associates - Immediate Total | Petersen (2004)                                 | No         | No       | Raw < 18   | 91 (83-96)              | 75 (64-83)               |
| Pike et al. (2013)      | 77  | 77  | WMS-IV Verbal Paired Associates - Delayed Total   | Petersen (2004)                                 | No         | No       | Raw < 6    | 85 (75-91)              | 81 (71-88)               |
| Troyer et al. (2008)    | 30  | 29  | BVMT-R Object Location Recall                     | Petersen (2004)                                 | No         | Yes      | Raw = 14.5 | 86 (69-94)              | 97 (84-100)              |
| Troyer et al. (2008)    | 30  | 29  | Digit Symbol                                      | Petersen (2004)                                 | No         | Yes      | Raw = 3.5  | 76 (58-88)              | 90 (74-97)               |

|                       |    |    |                                                         |                         |    |    |            |             |              |
|-----------------------|----|----|---------------------------------------------------------|-------------------------|----|----|------------|-------------|--------------|
|                       |    |    | Incidental Recall                                       |                         |    |    |            |             |              |
| Wang et al. (2013)    | 30 | 30 | Modified Spatial Context Memory Test Total (SCMT) Score | Petersen et al. (1999)  | No | No | Raw = 15   | 97 (84-100) | 93 (78-98)   |
| Wang et al. (2013)    | 30 | 30 | Event-place association memory subtest of SCMT          | Petersen et al. (1999)  | No | No | Raw = 5    | 97 (84-100) | 100 (89-100) |
| Vacante et al. (2013) | 40 | 20 | The Placing Test Paper and Pencil                       | Petersen & Kanow (2001) | No | No | Raw = 13.5 | 60 (39-78)  | 79 (64-89)   |
| Vacante et al. (2013) | 40 | 20 | The Placing Test Computerized Total                     | Petersen & Kanow (2001) | No | No | Raw = 19.5 | 70 (48-85)  | 76 (61-87)   |
| Vacante et al. (2013) | 40 | 20 | The Placing Test Computerized Objects and Faces         | Petersen & Kanow (2001) | No | No | Raw = 13.5 | 75 (53-89)  | 52 (37-67)   |

#### Other

| Author (Year)             | HC | MCI | Measure Name                              | Diagnostic Criteria                  | Used in Dx | 2x2 data | Cutoff        | Sns (CI <sub>95</sub> ) | Spec (CI <sub>95</sub> ) |
|---------------------------|----|-----|-------------------------------------------|--------------------------------------|------------|----------|---------------|-------------------------|--------------------------|
| <b>Recognition</b>        |    |     |                                           |                                      |            |          |               |                         |                          |
| Baek et al. (2011)        | 53 | 112 | Korean Story Recall Test Recognition      | Petersen et al. 2001                 | Unclear    | No       | Raw ≤ 6       | 70 (61-78)              | 56 (43-69)               |
| Baek et al. (2012)        | 53 | 127 | Seoul Verbal Learning Test Recognition    | Petersen et al. 2001                 | Unclear    | No       | Raw ≤ 19      | 70 (62-77)              | 68 (55-79)               |
| Baek et al. (2012)        | 53 | 127 | Korean Story Recall Test Recognition      | Petersen et al. 2001                 | Unclear    | No       | Raw ≤ 7       | 74 (66-81)              | 54 (41-67)               |
| Duff et al. (2010)        | 71 | 72  | RBANS List Recognition                    | Petersen et al. 1999                 | No         | No       | SD = -1       | 42 (30-54)              | 85 (74-92)               |
| Karrasch et al. (2005)    | 15 | 15  | CERAD Word List Recognition- Finnish      | Petersen et al. 2001                 | Unclear    | No       | Raw = 92      | 46 (24-69)              | Unavailable              |
| Loewenstein et al. (2004) | 53 | 53  | FULD Object Memory Evaluation Recognition | Petersen et al. 2001                 | No         | No       | None reported | 81 (68-89)              | 75 (62-85)               |
| Rabin et al. (2009)       | 51 | 38  | WMS-III Logical Memory Recognition        | Petersen, 2004; Petersen et al. 2001 | No         | No       | None reported | 92 (79-97)              | 84 (72-92)               |

|                                            |     |     |                                                                |                                            |         |    |               |            |            |
|--------------------------------------------|-----|-----|----------------------------------------------------------------|--------------------------------------------|---------|----|---------------|------------|------------|
| Ritter et al. (2006)                       | 25  | 20  | Topographical Recognition Memory Test                          | Petersen et al. 2001                       | No      | No | SD = -1.5     | 64 (42-81) | 73 (53-86) |
| <b>Combined and/or Interference Scores</b> |     |     |                                                                |                                            |         |    |               |            |            |
| Alegret et al. (2015)                      | 196 | 121 | S-FNAME (learning + initial cued recall + delayed cued recall) | Petersen & Morris (2005)                   | No      | No | None reported | 53 (44-62) | 84 (78-88) |
| Crocco et al. (2014)                       | 47  | 34  | LASSI-L List A Cued Recall + List B Cued Recall                | Petersen (2004)                            | Unclear | No | None Reported | 88 (73-95) | 92 (81-97) |
| Loewenstein et al. (2004)                  | 53  | 53  | FOME Combined Interference                                     | Petersen et al. (2001)                     | No      | No | None reported | 79 (66-88) | 87 (75-94) |
| Loewenstein et al. (2006)                  | 80  | 23  | FOME Combined Interference                                     | NINCDS-ADRDA without functional impairment | No      | No | SD = -1.5     | 70 (50-85) | 91 (83-96) |
| Shankle et al. (2005)                      | 119 | 95  | CERAD Word List Correspondence-Analysis Weighted Score         | CDR                                        | No      | No | None reported | 94 (93-95) | 89 (88-91) |
| <b>Miscellaneous</b>                       |     |     |                                                                |                                            |         |    |               |            |            |
| Blanco-Campal et al. (2009)                | 21  | 19  | Prospective Memory: Silly Sentences - Non-Specific Total       | Portet et al. 2006                         | No      | No | Raw < 8       | 84 (62-94) | 95 (77-99) |
| Blanco-Campal et al. (2009)                | 21  | 19  | Prospective Memory: Silly Sentences - Specific Total           | Portet et al. 2006                         | No      | No | Raw < 10      | 74 (52-88) | 95 (77-99) |
| Delprado et al. (2012)                     | 84  | 84  | CAMPROMPT Time                                                 | Petersen, 2004                             | No      | No | Raw < 9       | 69 (58-78) | 69 (58-78) |
| Delprado et al. (2012)                     | 84  | 84  | CAMPROMPT Event                                                | Petersen, 2004                             | No      | No | Raw < 10      | 73 (63-81) | 70 (60-79) |
| Delprado et al. (2012)                     | 84  | 84  | Prospective Memory: Prompt Card Task                           | Petersen, 2004                             | No      | No | Raw < 1       | 78 (68-86) | 73 (63-81) |
| Delprado et al. (2012)                     | 84  | 84  | Prospective Memory: Envelope Task                              | Petersen, 2004                             | No      | No | Raw < 3       | 66 (55-75) | 81 (71-88) |

|                       |    |    |                                                                                    |                 |     |    |            |            |            |
|-----------------------|----|----|------------------------------------------------------------------------------------|-----------------|-----|----|------------|------------|------------|
| Yassuda et al. (2010) | 58 | 39 | Rivermead Behavioral Memory Test - Profile Score (ed 8+ years) – Brazilian Version | Petersen (2004) | Yes | No | Raw = 20.5 | 71 (55-83) | 81 (69-89) |
| Yassuda et al. (2010) | 19 | 38 | Rivermead Behavioral Memory Test - Profile Score (ed <8 years) – Brazilian Version | Petersen (2004) | Yes | No | Raw = 19.5 | 69 (53-81) | 79 (57-92) |

*Abbreviations.* HC = Health Control; AD = Alzheimer’s disease; Dx = Diagnosis; Sns = Sensitivity; Spec = Specificity; CI<sub>95</sub> = 95% Confidence Interval; CERAD = Consortium for the ; RBANS = Repeatable Battery for the Assessment of Neuropsychological Status; SD = Standard Deviation; NAB = Neuropsychological Assessment Battery; T = t-score; CVLT-II = California Verbal Learning Test – 2<sup>nd</sup> edition; HVLN = Hopkins Verbal Learning Test; CDR = Clinical Dementia Rating; LASSI-L: Loewenstein-Acevedo Scales of Semantic Interference and Learning; FCSRT = Free and Cued Selective Reminding Task; RI-24 = Rappel Indices – 24; RI-48 = Rappel Indices – 48; WMS (-III, -IV, -R) = Wechsler Memory Scales (3<sup>rd</sup> Edition, 4<sup>th</sup> Edition, Revised Edition); NINCDS-ADRDA = National Institute of Neurological and Communicative Disorders and the Alzheimer’s Disease and Related Disorders Association; FOME = Fuld Object Memory Evaluation; ADAS-Cog = Alzheimer’s Disease Assessment Scale – Cognitive Subscale; WRT = Word Recall Task; CANTAB = Cambridge Neuropsychological Test Automated Battery; BVMT-R = Brief Visual Memory Test – Revised; SCMT = Spatial Context Memory Test Total; S-FNAME = Spanish – Face Name Associative Memory Exam; CAMPROMPT = Cambridge Test of Prospective Memory.

Additional References from Tables i-iii (not included in text)

- Adam, S., Van der Linden, M., Ivanoiu, A., Juillerat, A. C., Bechet, S., & Salmon, E. (2007). Optimization of encoding specificity for the diagnosis of early AD: the RI-48 task. *J Clin Exp Neuropsychol*, 29(5), 477-487.
- Alegret, M., Rodriguez, O., Espinosa, A., Ortega, G., Sanabria, A., Valero, S., et al. (2015). Concordance between Subjective and Objective Memory Impairment in Volunteer Subjects. *J Alzheimers Dis*, 48(4), 1109-1117.
- Beglinger, L. J., Duff, K., Moser, D. J., Cross, S. A., & Kareken, D. A. (2009). The Indiana Faces in Places Test: Preliminary Findings on a New Visuospatial Memory Test in Patients with Mild Cognitive Impairment. *Archives of Clinical Neuropsychology*, 24(6), 607.
- Brown, L. B., & Storandt, M. (2000). Sensitivity of category cued recall to very mild dementia of the Alzheimer type. *Arch Clin Neuropsychol*, 15(6), 529-534.
- Buschke, H., Mowrey, W. B., Ramratan, W. S., Zimmerman, M. E., Loewenstein, D. A., Katz, M. J., et al. (2017). Memory Binding Test Distinguishes Amnesic Mild Cognitive Impairment and Dementia from Cognitively Normal Elderly. *Arch Clin Neuropsychol*, 32(1), 29-39.
- \*Chandler, M. J., Lacritz, L. H., Hynan, L. S., Barnard, H. D., Allen, G., Deschner, M., et al. (2005). A total score for the CERAD neuropsychological battery. *Neurology*, 65(1), 102-106.
- Diesfeldt, H. F. (1990). Recognition memory for words and faces in primary degenerative dementia of the Alzheimer type and normal old age. *J Clin Exp Neuropsychol*, 12(6), 931-945.
- \*Gonzalez-Palau, F., Franco, M., Jimenez, F., Parra, E., Bernate, M., & Solis, A. (2013). Clinical utility of the hopkins Verbal Test-Revised for detecting Alzheimer's disease and mild cognitive impairment in Spanish population. *Arch Clin Neuropsychol*, 28(3), 245-253.
- \*Hogervorst, E., Combrinck, M., Lapuerta, P., Rue, J., Swales, K., & Budge, M. (2002). The Hopkins Verbal Learning Test and screening for dementia. *Dement Geriatr Cogn Disord*, 13(1), 13-20.
- \*Ivanoiu, A., Adam, S., Van der Linden, M., Salmon, E., Juillerat, A. C., Mulligan, R., et al. (2005). Memory evaluation with a new cued recall test in patients with mild cognitive impairment and Alzheimer's disease. *J Neurol*, 252(1), 47-55.
- \*Kuslansky, G., Katz, M., Verghese, J., Hall, C. B., Lapuerta, P., LaRuffa, G., et al. (2004). Detecting dementia with the Hopkins Verbal Learning Test and the Mini-Mental State Examination. *Arch Clin Neuropsychol*, 19(1), 89-104.
- \*Lehrner, J., Maly, J., Gleiß, A., Auff, E., & Dal-Bianco, P. (2007). Demenzdiagnostik mit Hilfe der Vienna Neuropsychologischen Testbatterie (VNTB): Standardisierung, Normierung und Validierung. *Psychologie in Österreich*, 4&5, 358-365.
- \*Schrijnemaekers, A. M., de Jager, C. A., Hogervorst, E., & Budge, M. M. (2006). Cases with mild cognitive impairment and Alzheimer's disease fail to benefit from repeated exposure to episodic memory tests as compared with controls. *J Clin Exp Neuropsychol*, 28(3), 438-455.
- \*Shi, J., Wei, M., Tian, J., Snowden, J., Zhang, X., Ni, J., et al. (2014). The Chinese version of story recall: a useful screening tool for mild cognitive impairment and Alzheimer's disease in the elderly. *Biomed Central Psychiatry*, 14(71), 1-10.
- \*Takechi, H., & Dodge, H. H. (2010). Scenery Picture Memory Test: a new type of quick and effective screening test to detect early stage Alzheimer's disease patients. *Geriatr Gerontol Int*, 10(2), 183-190.
- \*Thompson, T. A., Wilson, P. H., Snyder, P. J., Pietrzak, R. H., Darby, D., Maruff, P., et al. (2011). Sensitivity and test-retest reliability of the international shopping list test in assessing verbal learning and memory in mild Alzheimer's disease. *Arch Clin Neuropsychol*, 26(5), 412-424
- \*Vogel, A., Mortensen, E. L., Gade, A., & Waldemar, G. (2007). The Category Cued Recall test in very mild Alzheimer's disease: discriminative validity and correlation with semantic memory functions. *Eur J Neurol*, 14(1), 102-108.
